# Supplementary material for: NiO/ZrO2 nanocomposites as photocathodes of tandem DSCs with higher photoconversion efficiency with respect to parent single-photoelectrode p-DSCs
Source: Royal Society of Chemistry journal article supplement (doi:10.1039/d1se00566a), 2021-01-01
Supplement: d1se00566a1.pdf [file d1se00566a1.pdf]

## Electronic Supporting Information

**Title:** NiO/ZrO<sub>2</sub> nanocomposites as photocathodes of tandem DSCs with higher photoconversion efficiency with respect to parent single-photoelectrode *p*-DSCs

**Authors:** Matteo Bonomo, Emmanuel J. Ekoi, Andrea G. Marrani, Ana Y. Segura Zarate, Denis P. Dowling, Claudia Barolo, Danilo Dini

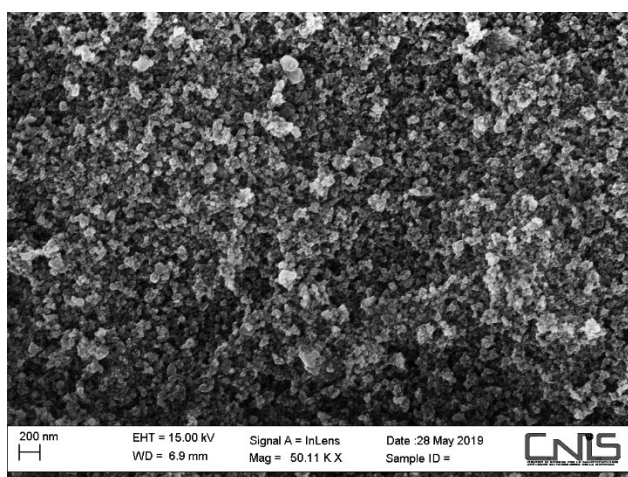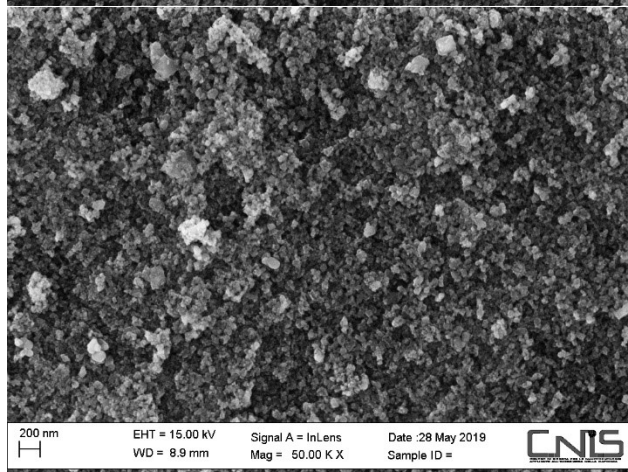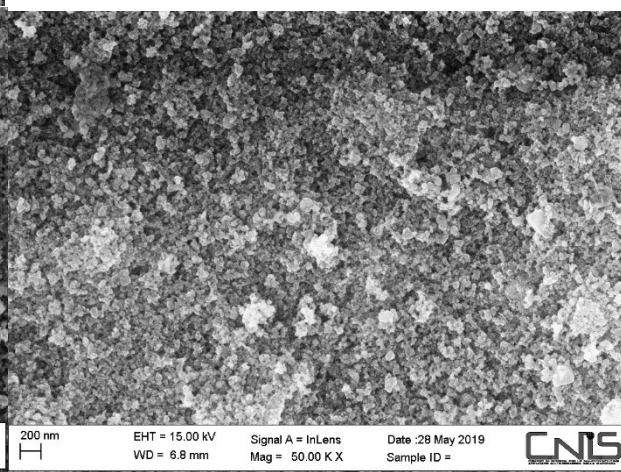

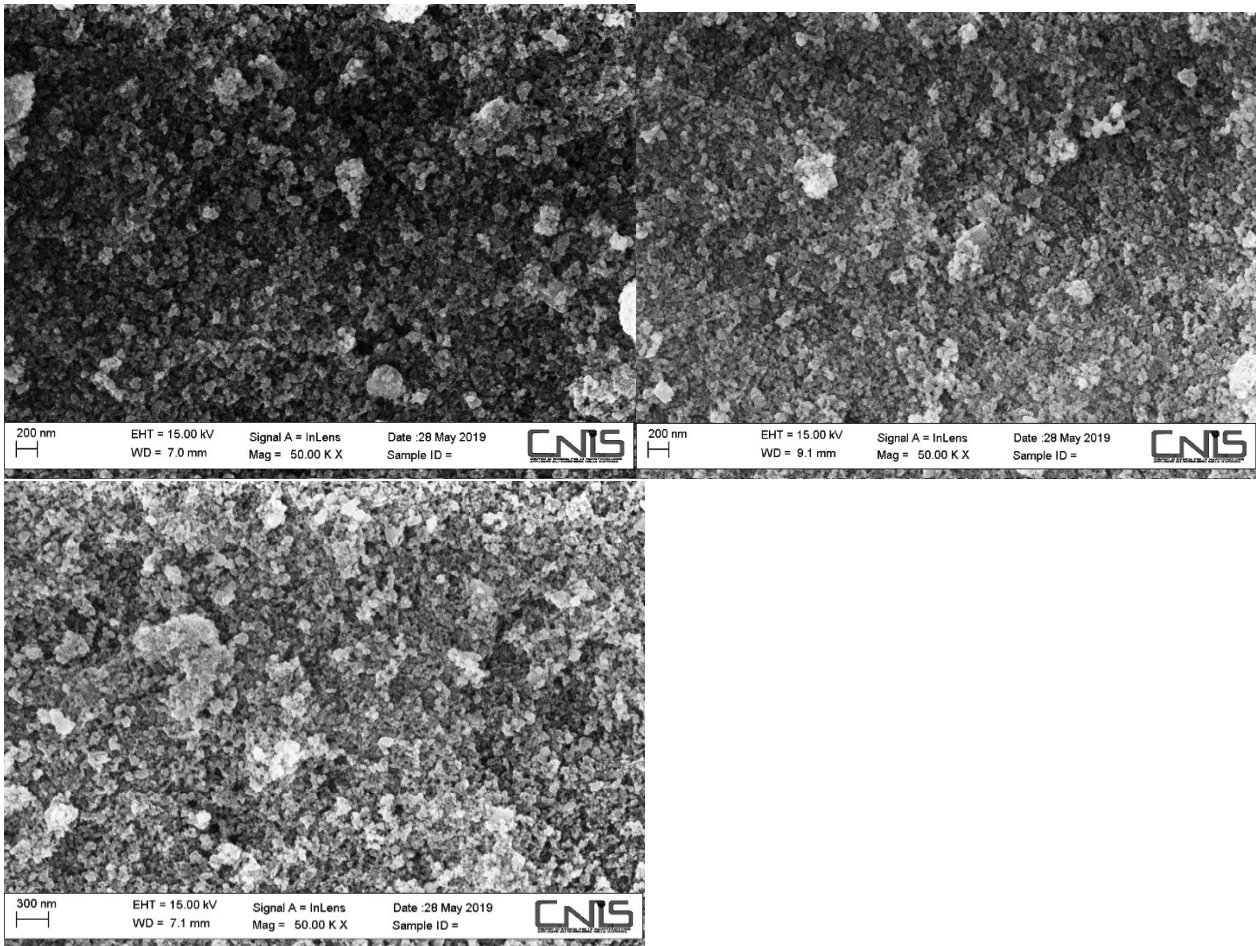

**Figure S1.** Top-down SEM images of NZNC electrodes with different ZrO<sub>2</sub>/NiO ratio: 0% (top left), 1% (top right), 2% (middle left), 5% (middle right), 10% (bottom left) and 20% (bottom right). Scale 200 nm.

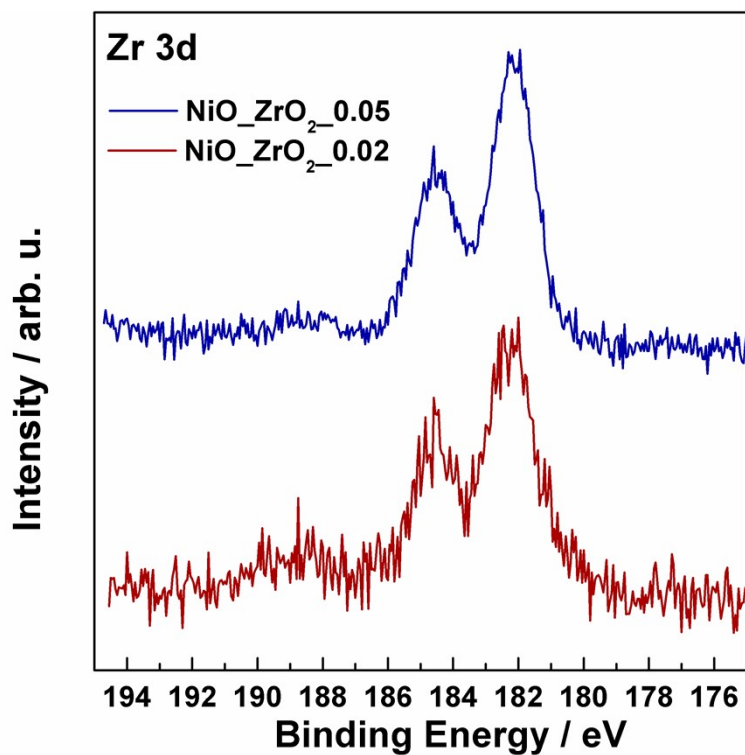

**Figure S2.** Zr 3d photoionisation region of two relevant samples: NiO\_ZrO<sub>2</sub>\_0.02 (red), and NiO\_ZrO<sub>2</sub>\_0.05 (blue).

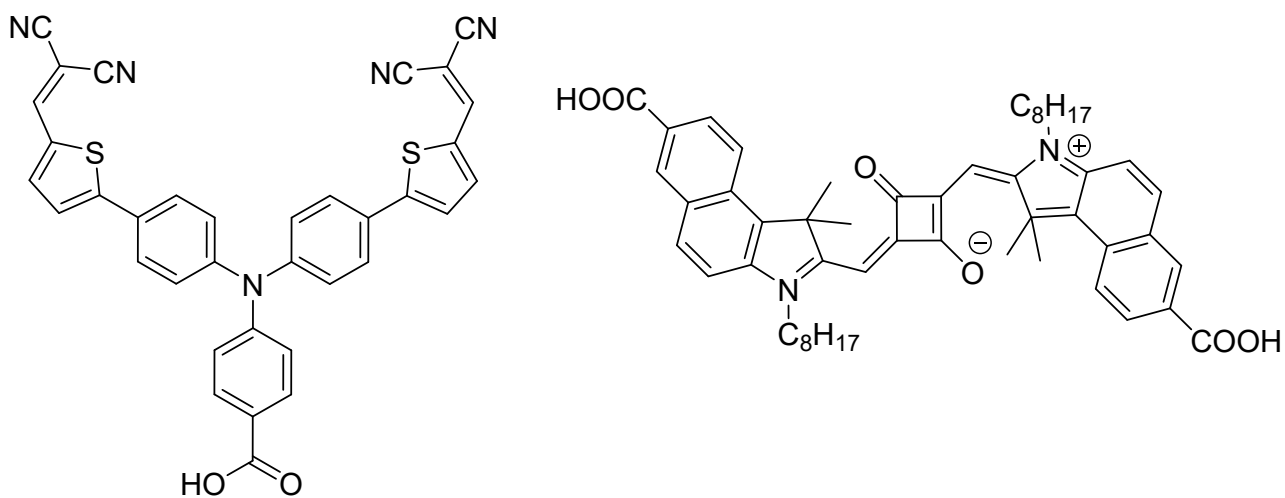

**Figure S3.** Chemical structure of (left) P1 and (right) VG10-C8. P1 and VG10-C8 represent the dye-sensitizers of the cathode and anode, respectively, for the various types of DSCs here assembled and characterized.

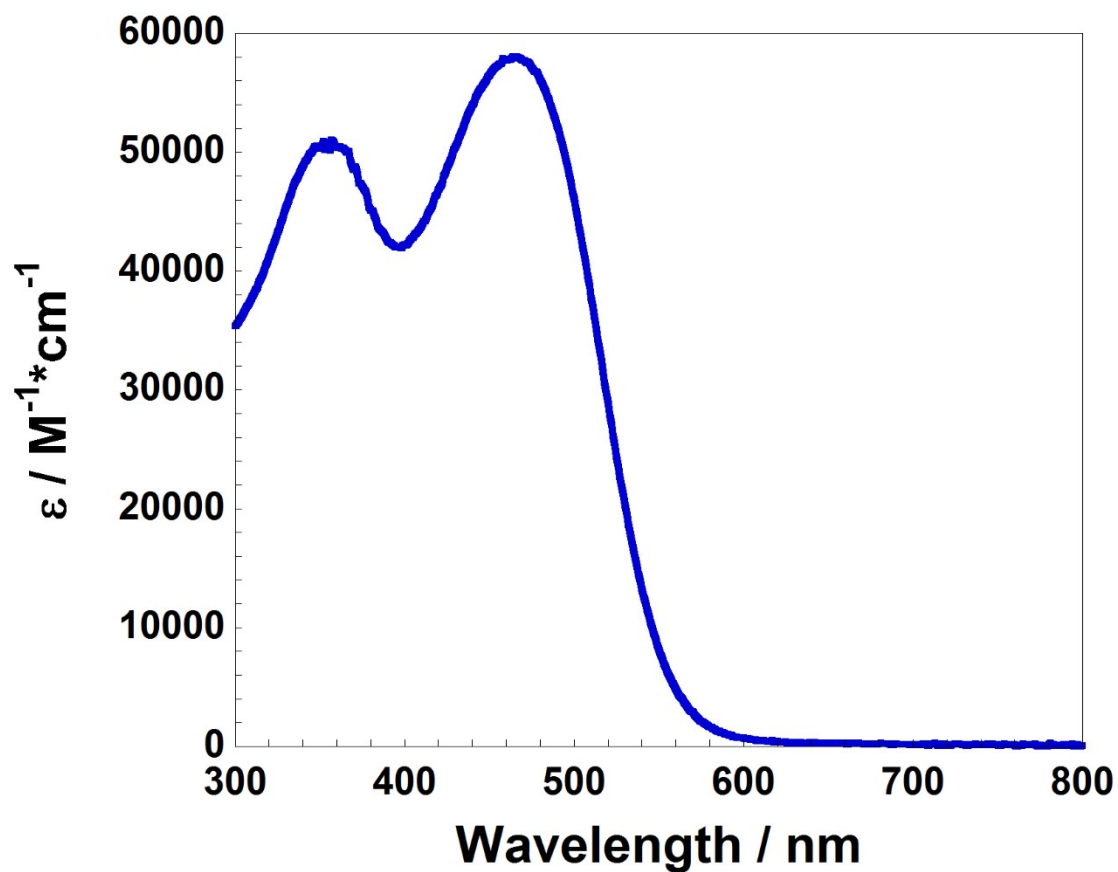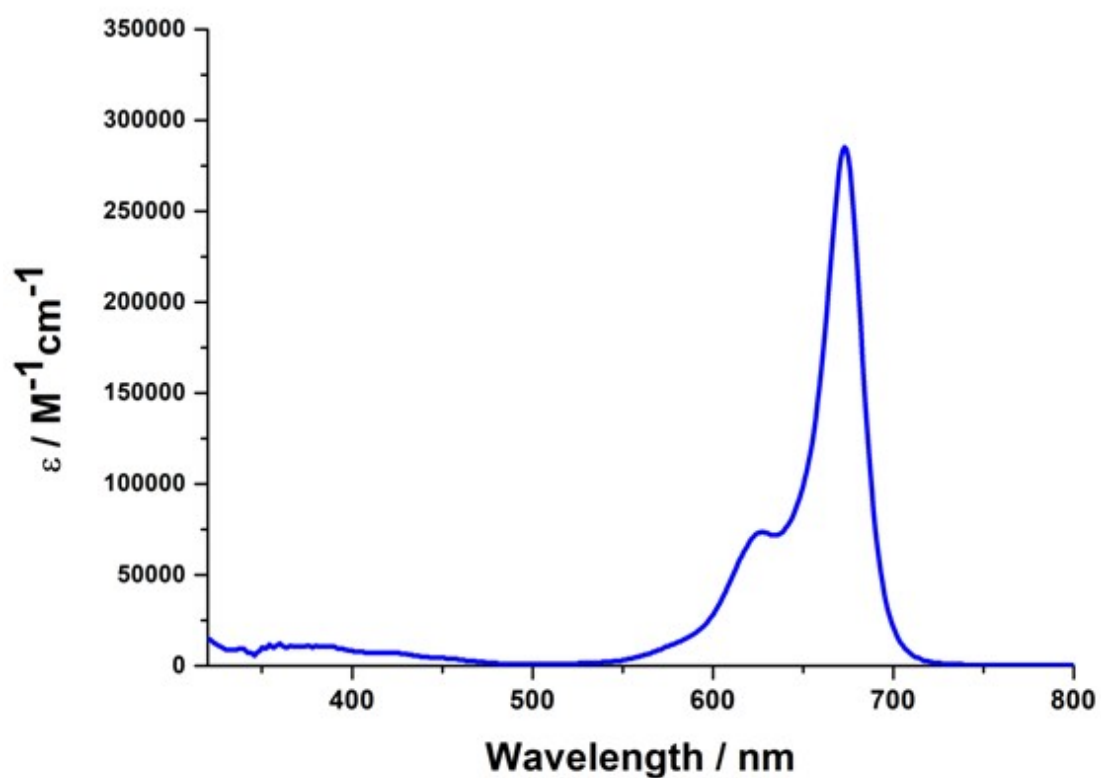

**Figure S4.** Absorption spectra of (top) P1 in ACN and (bottom) VG10-C8 in ethanol.

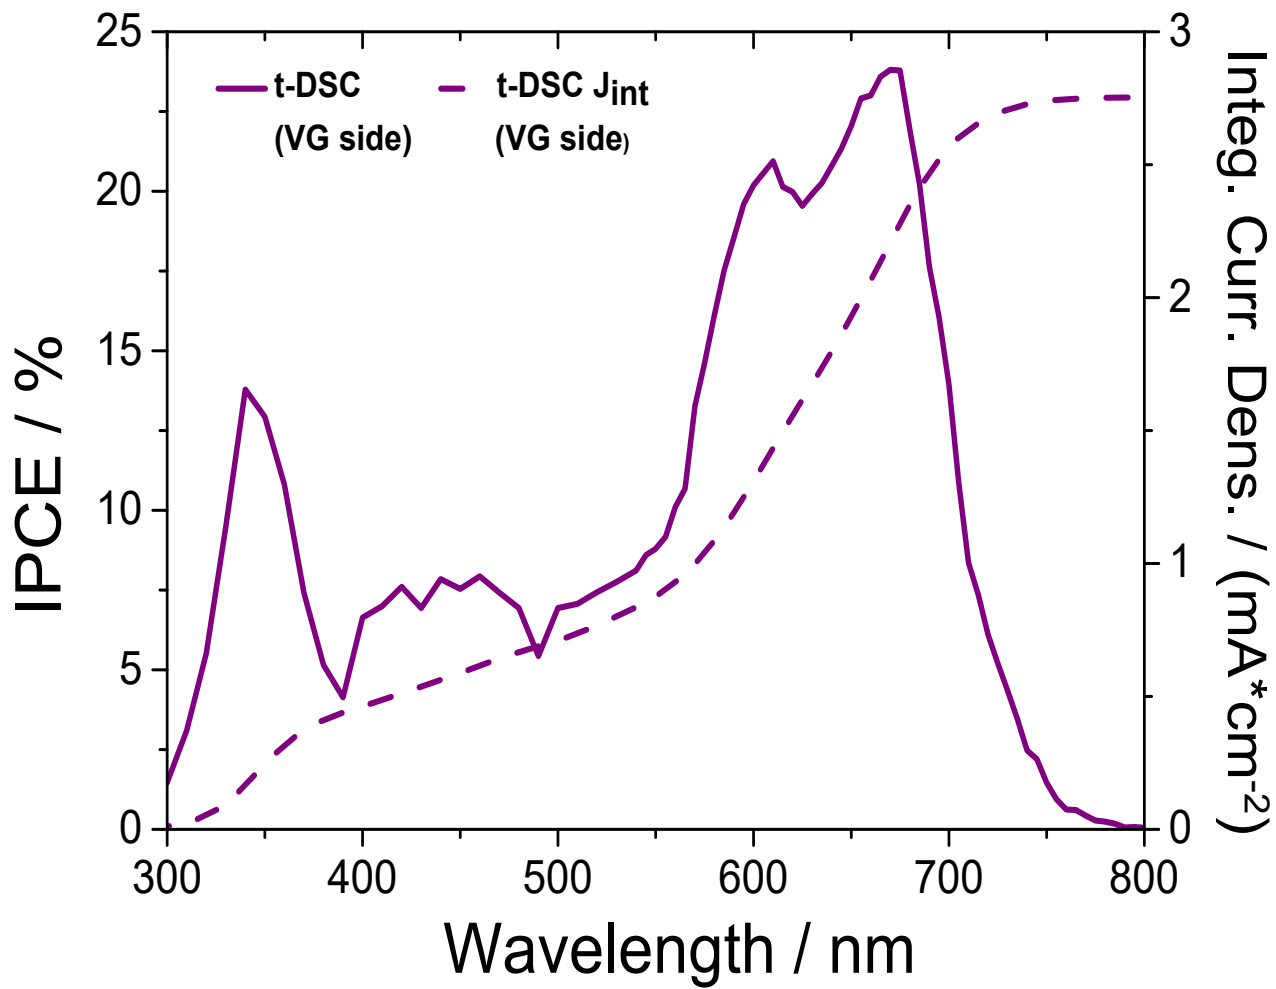

**Figure S5.** IPCE profiles t-DSC when the NZNC cathode with  $X = 0.2$  is sensitized with P1 and the TiO<sub>2</sub> anode is sensitized with VG10-C8. Dotted lines in the right frame refer to the  $J_{sc}$  integrated curve recorded during the collection of the IPCE spectra. The t-DSC was illuminated from the side of the photoanode.

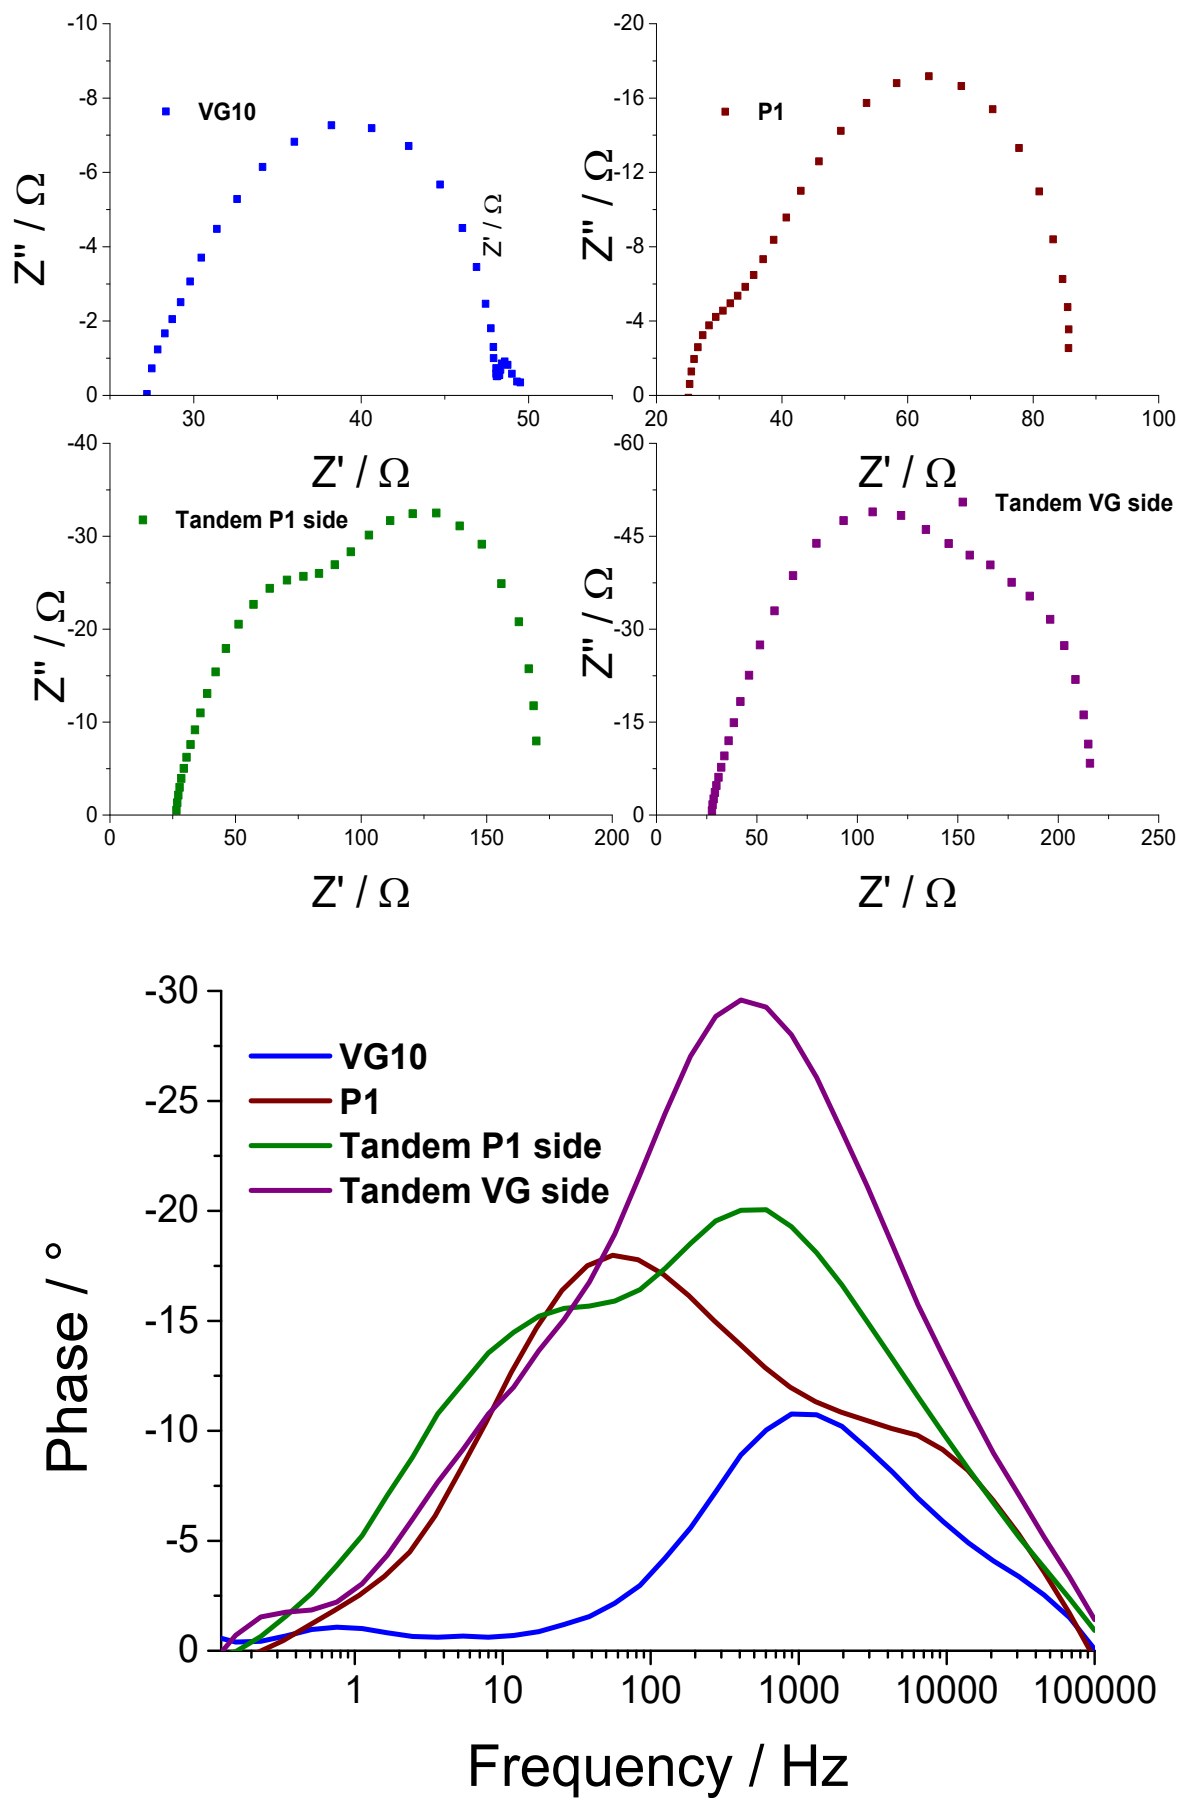

**Figure S6. Electrochemical Impedance Spectra of single junction and tandem DSSCs devices as both Nyquist's (top frames) and Bode's plot (bottom frame): single junction n-type (blue), single junction p-type (wine), tandem device illuminated from photocathode (green) or from photoanode (purple).**

| ZrO <sub>2</sub> (%)                                     | 0                 | 2                 | 0                 | 2                 |
|----------------------------------------------------------|-------------------|-------------------|-------------------|-------------------|
| Deposition method                                        | Screen-printing   |                   | Spray-Deposition  |                   |
| <b>R<sub>CE</sub> (Ω)</b>                                | <b>13.0 ± 0.1</b> | <b>13.0 ± 0.1</b> | <b>4.1 ± 0.2</b>  | <b>4.1 ± 0.3</b>  |
| <b>C<sub>CE</sub> (μF)</b>                               | <b>12.7 ± 0.3</b> | <b>12.4 ± 0.2</b> | <b>10.9 ± 0.4</b> | <b>10.2 ± 0.5</b> |
| <b>R<sub>t</sub> (Ω)</b>                                 | <b>27.3 ± 0.5</b> | <b>20.8 ± 0.2</b> | <b>42.9 ± 0.5</b> | <b>31.0 ± 0.5</b> |
| <b>R<sub>rec</sub> (Ω)</b>                               | <b>56.3 ± 0.5</b> | <b>70.3 ± 0.7</b> | <b>76.7 ± 1.1</b> | <b>102 ± 0.8</b>  |
| <b>C<sub>μ</sub> (μF)</b>                                | <b>89 ± 3</b>     | <b>115 ± 4</b>    | <b>164 ± 4</b>    | <b>198 ± 3</b>    |
| <b>τ<sub>h</sub> (ms)</b>                                | <b>2.4 ± 0.1</b>  | <b>2.3 ± 0.1</b>  | <b>7.0 ± 0.3</b>  | <b>6.1 ± 0.4</b>  |
| <b>τ<sub>rec</sub> (ms)</b>                              | <b>5.0 ± 0.1</b>  | <b>8.1 ± 0.1</b>  | <b>12.6 ± 0.6</b> | <b>20.2 ± 0.9</b> |
| <b>L<sub>h</sub> (μm)</b>                                | <b>2.9 ± 0.3</b>  | <b>3.7 ± 0.2</b>  | <b>2.7 ± 0.4</b>  | <b>3.6 ± 0.2</b>  |
| <b>D<sub>h</sub> (cm<sup>2</sup>/s) *10<sup>-5</sup></b> | <b>3.4 ± 0.1</b>  | <b>5.7 ± 0.2</b>  | <b>1.0 ± 0.1</b>  | <b>2.2 ± 0.1</b>  |

**Table S1.** Microscopic parameters with the relative errors as determined by the interpolation of EIS spectra of NZNC electrodes with different ZrO<sub>2</sub> content (i.e. 0 or 2%) and deposited by two different approaches (i.e. screen-printing, SP, and spray-deposition, SD). The reported values are averaged considering the measurements conducted on three different cells with the photoelectrodes from the same batch.
